# Supplementary material
Source: Springer Nature journal article supplement (http://www.nature.com/ng/journal/v35/n4/extref/ng1203-292-S3.pdf)
Supplement: ng1203-292-S3.pdf [file ng1203-292-S3.pdf]

**Supplementary table 1** Biological sources of RNA and success of measurement of the degradation factor by the Degradometer software.

| <b>organism</b> | <b>tissue</b>        | <b>degradation factor</b> |
|-----------------|----------------------|---------------------------|
| human           | cell cultures        | +                         |
| human           | natural killer cells | +                         |
| human           | aorta                | +                         |
| human           | peripheral blood     | +                         |
| human           | melanoma             | +                         |
| human           | head and neck cancer | +                         |
| human           | bone marrow          | +                         |
| human           | peripheral blood     | +                         |
| mouse           | cell cultures        | +                         |
| mouse           | liver                | +                         |
| mouse           | spleen               | +                         |
| mouse           | brain                | +                         |
| mouse           | kidney               | +                         |
| rat             | colon                | +                         |
| dog             | lymphoma             | +                         |
| dog             | lymph nodes          | +                         |
| yeast           | cell cultures        | - <sup>1</sup>            |
| drosophila      | wing discs           | - <sup>1</sup>            |
| arabidopsis     | cell cultures        | - <sup>1</sup>            |

<sup>1</sup> 18 S and/or 28 S rRNA are not recognized by the software
